# Supplementary material for: Neuroretinal Rim Response to Transient Intraocular Pressure Challenge Predicts the Extent of Retinal Ganglion Cell Loss in Experimental Glaucoma
Source: PubMed Central journal article supplement — Invest Ophthalmol Vis Sci. 2023 May 31;64(5):30. doi: 10.1167/iovs.64.5.30 (PMC10233313; doi:10.1167/iovs.64.5.30), 2023-05-31
Supplement: iovs-64-5-30_s001.pdf [file iovs-64-5-30_s001.pdf]

## Supplemental Data

| Variable                        | Slope | t-ratio | prob  | Partial corr |
|---------------------------------|-------|---------|-------|--------------|
| * Pre-cannulation BMO position  | -0.67 | -3.81   | <0.01 | -0.68        |
| * Pre-cannulation MRW           | 0.10  | 2.67    | 0.02  | 0.54         |
| * Pre-cannulation ALCS position | 0.06  | 2.35    | 0.03  | 0.50         |
| Age                             | -0.15 | -0.15   | 0.361 | -0.23        |
| Axial Length                    | -0.07 | -0.36   | 0.73  | -0.09        |
| CCT                             | -0.09 | -0.56   | 0.58  | -0.14        |
| Pre-cannulation RNFL            | 0.02  | 0.10    | 0.93  | 0.02         |
| Pre-cannulation BMO Area        | 0.05  | 0.26    | 0.8   | 0.06         |

**Supplemental Table 1.** Included and excluded variables for the stepwise linear regression for the maximum change in MRW with 25mmHg pressure challenge. \* sig. at p<0.05

| Variable                      | Slope | t-ratio | prob | Partial corr |
|-------------------------------|-------|---------|------|--------------|
| * Pre-cannulation MRW         | 0.07  | 2.88    | 0.01 | 0.55         |
| Age                           | -0.28 | -1.44   | 0.17 | -0.32        |
| Axial Length                  | 0.07  | 0.34    | 0.74 | 0.08         |
| CCT                           | -0.05 | -0.23   | 0.82 | -0.05        |
| Pre-cannulation RNFL          | -0.08 | -0.35   | 0.73 | -0.08        |
| Pre-cannulation BMO position  | -0.20 | -1.03   | 0.32 | -0.24        |
| Pre-cannulation BMO Area      | 0.35  | 1.92    | 0.07 | 0.41         |
| Pre-cannulation ALCS position | 0.13  | 0.69    | 0.50 | 0.16         |

**Supplemental Table 2.** Included and excluded variables for the stepwise linear regression for the time constant at 25mmHg. \* sig. at p<0.05

| Variable                        | Slope | t-ratio | prob | Partial corr |
|---------------------------------|-------|---------|------|--------------|
| * Pre-cannulation ALCS position | -0.09 | -2.84   | 0.01 | -0.55        |
| Age                             | 0.07  | 0.35    | 0.73 | 0.08         |
| Axial Length                    | 0.18  | 0.93    | 0.36 | 0.22         |
| CCT                             | 0.002 | 0.01    | 0.99 | 0.002        |
| Pre-cannulation RNFL            | 0.09  | 0.41    | 0.69 | 0.10         |
| Pre-cannulation MRW             | -0.21 | -1.07   | 0.30 | -0.24        |
| Pre-cannulation BMO position    | 0.05  | 0.27    | 0.79 | 0.06         |
| Pre-cannulation BMO Area        | 0.18  | 0.93    | 0.37 | 0.21         |

**Supplemental Table 3.** Included and excluded variables for the stepwise linear regression for the maximum change in BMO position with pressure challenge. \* sig. at p<0.05

| Variable                        | Slope | t-ratio | prob  | Partial corr |
|---------------------------------|-------|---------|-------|--------------|
| * Pre-cannulation ALCS position | 0.13  | 7.36    | <0.01 | 0.88         |
| * Pre-cannulation MRW           | 0.11  | 3.86    | <0.01 | 0.70         |
| * Pre-cannulation CCT           | 0.17  | 4.05    | <0.01 | 0.71         |
| * Pre-cannulation BMO area      | -8.04 | -2.30   | 0.04  | -0.50        |
| Age                             | 0.06  | 0.40    | 0.69  | 0.10         |
| Axial Length                    | -0.06 | -0.55   | 0.93  | -0.14        |
| Pre-cannulation RNFL            | 0.10  | 0.69    | 0.50  | 0.17         |
| Pre-cannulation BMO position    | 0.14  | 1.23    | 0.24  | 0.30         |

**Supplemental Table 4.** Included and excluded variables for the stepwise linear regression for the maximum change in ALCS position with pressure challenge. \* sig. at p<0.05

| Variable                                 | Slope  | t-ratio | prob  | Partial corr |
|------------------------------------------|--------|---------|-------|--------------|
| * Change in Axial Length @ 1000mmHg.days | 236.46 | 7.28    | <0.01 | 0.90         |
| Age                                      | 0.14   | 1.170   | 0.27  | 0.33         |
| Average IOP                              | 0.22   | 2.00    | 0.07  | 0.52         |
| Days to 1000mmHg.days                    | -0.11  | -0.91   | 0.38  | -0.26        |
| Pre-cannulation CCT                      | 0.21   | 1.86    | 0.09  | 0.49         |
| Pre-cannulation ACD                      | -0.05  | -0.39   | 0.71  | -0.12        |
| Pre-cannulation Axial Length             | 0.01   | 0.07    | 0.95  | 0.02         |
| Change in ACD @ 1000mmHg.days            | 0.25   | 1.09    | 0.30  | 0.31         |

**Supplemental Table 5.** Included and excluded variables for the stepwise linear regression for the loss of MRW at 1000mmHg.days and changes in biometry. \* sig. at p<0.05

| Variable                                 | Slope | t-ratio | prob  | Partial corr |
|------------------------------------------|-------|---------|-------|--------------|
| * Change in Axial Length @ 1000mmHg.days | 63.75 | 6.36    | <0.01 | 0.83         |
| * Pre-cannulation CCT                    | 0.30  | 2.75    | 0.02  | 0.64         |
| Age                                      | 0.09  | 0.68    | 0.51  | 0.21         |
| Average IOP                              | 0.06  | 0.34    | 0.74  | 0.11         |
| Days to 1000mmHg.days                    | 0.02  | 0.17    | 0.87  | 0.05         |
| Pre-cannulation ACD                      | 0.06  | 0.44    | 0.67  | 0.14         |
| Pre-cannulation Axial Length             | -0.04 | -0.28   | 0.78  | -0.09        |
| Change in ACD @ 1000mmHg.days            | 0.06  | 0.25    | 0.81  | 0.08         |

**Supplemental Table 6.** Included and excluded variables for the stepwise linear regression for the loss of RNFL at 1000mmHg.days and changes in biometry. \* sig. at p<0.05

| Variable                                     | Slope | t-ratio | prob  | Partial corr |
|----------------------------------------------|-------|---------|-------|--------------|
| * Maximum Return at 10mmHg                   | 14.15 | 4.63    | <0.01 | 0.80         |
| Age                                          | -0.13 | -0.69   | 0.51  | -0.20        |
| Pre-cannulation CCT                          | -0.18 | -0.85   | 0.42  | -0.25        |
| Pre-cannulation AL                           | 0.01  | 0.03    | 0.80  | 0.01         |
| Average IOP                                  | 0.01  | 0.03    | 0.98  | 0.01         |
| Days to 1000mmHg.days                        | -0.20 | -1.16   | 0.27  | -0.33        |
| Maximum MRW change at 25mmHg                 | 0.28  | 1.72    | 0.11  | 0.46         |
| Time constant at 25mmHg                      | 0.22  | 1.28    | 0.23  | 0.36         |
| Time constant at 10mmHg                      | -0.08 | -0.46   | 0.66  | -0.14        |
| BMO position change with pressure challenge  | -0.12 | -0.62   | 0.55  | -0.18        |
| ALCS position change with pressure challenge | -0.08 | -0.36   | 0.73  | -0.11        |

**Supplemental Table 7.** Included and excluded variables for the stepwise linear regression for the loss of MRW at 1000mmHg.days and cannulated pressure challenge metrics. \* sig. at p<0.05

| Variable                                     | Slope | t-ratio | prob  | Partial corr |
|----------------------------------------------|-------|---------|-------|--------------|
| * Maximum Return at 10mmHg                   | 4.69  | 6.30    | <0.01 | 0.88         |
| Age                                          | -0.13 | -0.85   | 0.41  | -0.25        |
| Pre-cannulation CCT                          | -0.05 | -0.31   | 0.77  | -0.09        |
| Pre-cannulation AL                           | -0.05 | -0.32   | 0.76  | -0.10        |
| Average IOP                                  | -0.4  | -0.26   | 0.80  | -0.08        |
| Days to 1000mmHg.days                        | -0.15 | -1.09   | 0.30  | -3.11        |
| Maximum MRW change at 25mmHg                 | 0.23  | 1.79    | 0.1   | 0.48         |
| Time constant at 25mmHg                      | 0.20  | 1.48    | 0.17  | 0.41         |
| Time constant at 10mmHg                      | -0.06 | -0.40   | 0.70  | -0.12        |
| BMO position change with pressure challenge  | 0.04  | 0.23    | 0.82  | 0.07         |
| ALCS position change with pressure challenge | -0.1  | -0.60   | 0.56  | -0.18        |

**Supplemental Table 8.** Included and excluded variables for the stepwise linear regression for the loss of RNFL at 1000mmHg.days and cannulated pressure challenge metrics. \* sig. at p<0.05

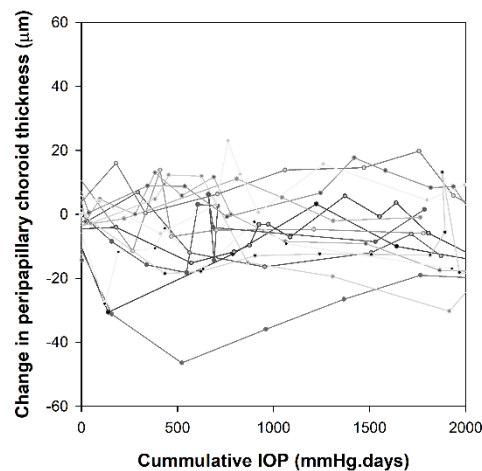

**Supplemental Figure 1.** Change in average peripapillary choroid (BMO to 250µm)<sup>1</sup> in experimental glaucoma animals, up to 2000mmHg.days.

## **References**

1. Patel N, McAllister F, Pardon L, Harwerth R. The effects of graded intraocular pressure challenge on the optic nerve head. *Exp Eye Res* 2018;169:79-90.
